# Supplementary material
Source: PubMed Central journal article supplement (PMC2979309)
Supplement: NIHMS249357-supplement-01.pdf [file NIHMS249357-supplement-01.pdf]

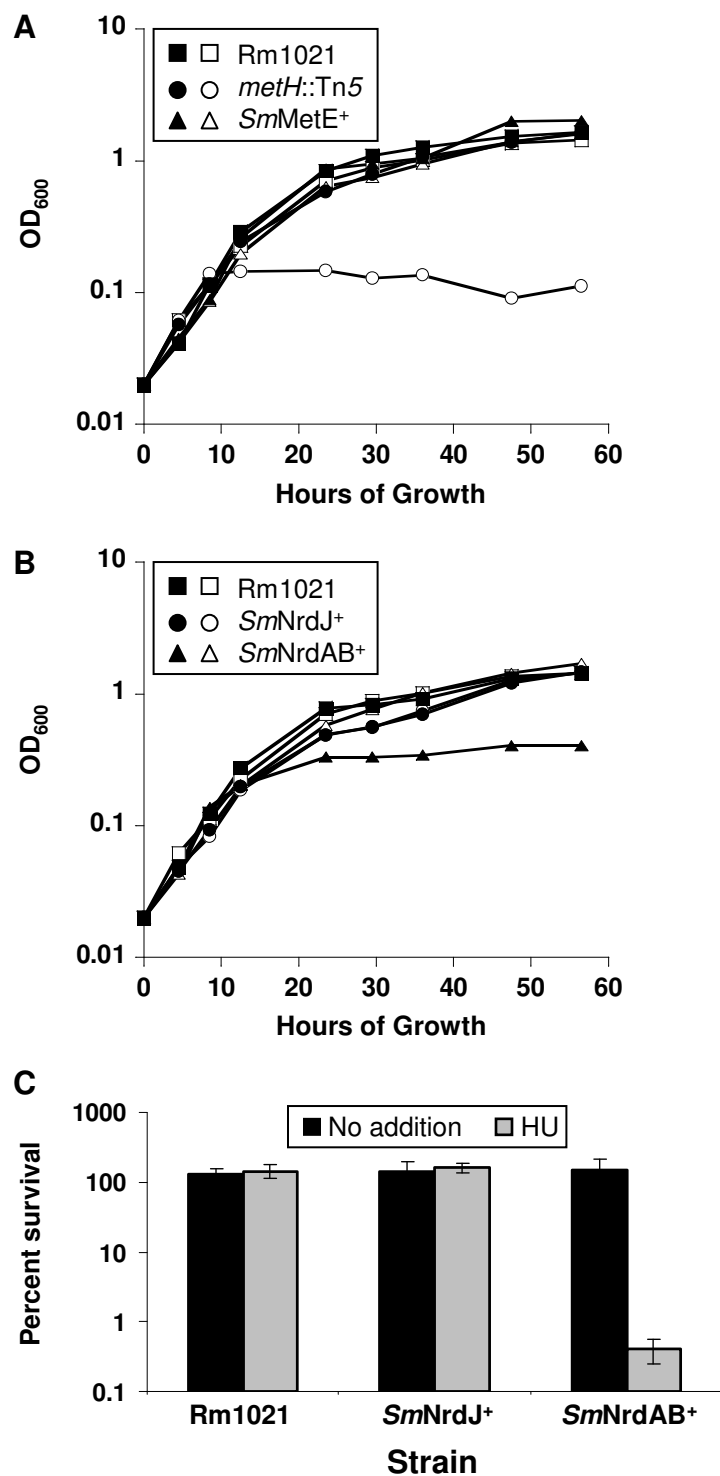

**Supplementary Figure 1. Free-living growth of *S. meliloti* expressing *E. coli* methionine synthase and RNR.** **A.** Growth of Rm1021 (squares), *methH::Tn5* (circles), and *SmMetE*<sup>+</sup> (triangles) in M9 is shown in the presence (filled symbols) and absence (open symbols) of methionine (0.1 mg ml<sup>-1</sup>). **B.** Growth of Rm1021 (squares), *SmNrdJ*<sup>+</sup> (circles), and *SmNrdAB*<sup>+</sup> (triangles) in M9 is shown in the presence (filled symbols) and absence (open symbols) of HU (1 mM). **C.** HU is bacteriocidal in *SmNrdAB*<sup>+</sup>. Viable cells (colony forming units) in cultures grown for 24 h in M9 (black bars) and M9 containing 1 mM HU (gray bars) are reported as the percentage of the colony number in the absence of HU.
